# Supplementary material for: Characterization of soil bacterial, archaeal and fungal communities inhabiting archaeological human-impacted layers at Monte Iato settlement (Sicily, Italy)
Source: PubMed Central journal article supplement (PMC5789874; doi:10.1038/s41598-018-20347-8), 2018-01-30
Supplement: 41598_2018_20347_MOESM1_ESM.pdf [file 41598_2018_20347_MOESM1_ESM.pdf]

## **SUPPLEMENTARY MATERIAL**

### **Characterization of soil bacterial, archaeal and fungal communities inhabiting archaeological human-impacted layers at Monte Iato settlement (Sicily, Italy)**

José A. Siles, Birgit Öhlinger, Tomas Cajthaml, Erich Kistler, Rosa Margesin\*

\*Corresponding author: Rosa Margesin; E-mail address: [rosa.margesin@uibk.ac.at](mailto:rosa.margesin@uibk.ac.at)

### **Scientific Reports**

The supplementary material includes Tables S1-S11

**Table S1.** Diversity characteristics of CLPPs (community level physiological profile) as well as archaeal, bacterial and fungal communities found in soil samples of the studied layers A14 (upper), A16 (intermediate) and A18 (lower). The data represent the mean values of the six replicate libraries analyzed in each layer. For each variable, data followed by different letters are significantly different according to Tukey's HSD test ( $p \leq 0.05$ ).

|                             | <b>A14</b>     | <b>A16</b>      | <b>A18</b>     |
|-----------------------------|----------------|-----------------|----------------|
| <b>CLPP-based diversity</b> |                |                 |                |
| Richness                    | 14.67 <b>a</b> | 15.33 <b>a</b>  | 11.67 <b>a</b> |
| Shannon index               | 2.05 <b>a</b>  | 2.54 <b>b</b>   | 2.20 <b>ab</b> |
| Evenness                    | 0.78 <b>a</b>  | 0.93 <b>b</b>   | 0.90 <b>ab</b> |
| <b>Bacterial community</b>  |                |                 |                |
| Richness                    | 1566 <b>a</b>  | 1418 <b>a</b>   | 1393 <b>a</b>  |
| Shannon index               | 6.15 <b>b</b>  | 5.65 <b>a</b>   | 5.83 <b>a</b>  |
| Chao 1                      | 1958 <b>a</b>  | 1785 <b>a</b>   | 1743 <b>a</b>  |
| ACE                         | 1962 <b>a</b>  | 1777 <b>a</b>   | 1749 <b>a</b>  |
| Evenness                    | 0.352 <b>a</b> | 0.345 <b>a</b>  | 0.364 <b>a</b> |
| <b>Archaeal community</b>   |                |                 |                |
| Richness                    | 37.17 <b>a</b> | 44.83 <b>a</b>  | 40.67 <b>a</b> |
| Shannon index               | 1.69 <b>a</b>  | 1.66 <b>a</b>   | 1.48 <b>a</b>  |
| Chao 1                      | 49.94 <b>a</b> | 62.12 <b>a</b>  | 54.50 <b>a</b> |
| ACE                         | 55.57 <b>a</b> | 66.83 <b>a</b>  | 54.82 <b>a</b> |
| Evenness                    | 0.485 <b>b</b> | 0.468 <b>ab</b> | 0.462 <b>a</b> |
| <b>Fungal community</b>     |                |                 |                |
| Richness                    | 147.0 <b>a</b> | 136.5 <b>a</b>  | 131.0 <b>a</b> |
| Shannon index               | 2.77 <b>a</b>  | 2.05 <b>a</b>   | 2.28 <b>a</b>  |
| Chao 1                      | 184.9 <b>a</b> | 173.5 <b>a</b>  | 155.6 <b>a</b> |
| ACE                         | 177.7 <b>a</b> | 174.9 <b>a</b>  | 158.7 <b>a</b> |
| Evenness                    | 0.502 <b>a</b> | 0.498 <b>a</b>  | 0.494 <b>a</b> |

**Table S2.** SIMPER (similarity percentage) analysis of CLPPs (community level physiological profile) showing the contribution of each C source to the dissimilarity among the studied layers A14 (upper), A16 (intermediate) and A18 (lower).

| C-source number | C source                             | C-source family             | Av. dissim <sup>1</sup> | Contrib <sup>2</sup> (%) | Cumulative <sup>3</sup> (%) | AWCD in A14 <sup>4</sup> | AWCD in A16 <sup>4</sup> | AWCD in A18 <sup>4</sup> |
|-----------------|--------------------------------------|-----------------------------|-------------------------|--------------------------|-----------------------------|--------------------------|--------------------------|--------------------------|
| 1               | L-Serine                             | Amino acids                 | 6.38                    | 10.22                    | 10.22                       | 0.156                    | 0.075                    | 0.064                    |
| 2               | Tween 80                             | Polymers                    | 5.90                    | 9.44                     | 19.66                       | 0.040                    | 0.126                    | 0.145                    |
| 3               | Tween 40                             | Polymers                    | 4.92                    | 7.87                     | 27.54                       | 0.001                    | 0.124                    | 0.093                    |
| 4               | L-Asparagine                         | Amino acids                 | 4.07                    | 6.52                     | 34.06                       | 0.023                    | 0.087                    | 0.120                    |
| 5               | L-Arginine                           | Amino acids                 | 3.51                    | 5.63                     | 39.68                       | 0.063                    | 0.075                    | 0.104                    |
| 6               | Pyruvic Acid Methyl Ester            | Carbohydrates               | 3.28                    | 5.25                     | 44.93                       | 0.086                    | 0.057                    | 0.059                    |
| 7               | D-Mannitol                           | Carbohydrates               | 3.04                    | 4.86                     | 49.80                       | 0.023                    | 0.083                    | 0.067                    |
| 8               | Putrescine                           | Amines/Amides               | 2.72                    | 4.36                     | 54.15                       | 0.036                    | 0.050                    | 0.056                    |
| 9               | Itaconic Acid                        | Carboxylic and Acetic Acids | 2.61                    | 4.18                     | 58.33                       | 0.029                    | 0.063                    | 0.078                    |
| 10              | 4-Hydroxy Benzoic Acid               | Carboxylic and Acetic Acids | 2.43                    | 3.90                     | 62.23                       | 0.005                    | 0.050                    | 0.057                    |
| 11              | N-Acetyl-D-Glucosamine               | Carbohydrates               | 2.34                    | 3.76                     | 65.98                       | 0.026                    | 0.045                    | 0.058                    |
| 12              | D-Malic Acid                         | Carboxylic and Acetic Acids | 2.04                    | 3.27                     | 69.25                       | 0.002                    | 0.061                    | 0.002                    |
| 13              | Phenylethyl-amine                    | Amines/Amides               | 2.04                    | 3.26                     | 72.51                       | 0.034                    | 0.043                    | 0.028                    |
| 14              | D-Cellobiose                         | Carbohydrates               | 1.89                    | 3.03                     | 75.53                       | 0.056                    | 0.000                    | 0.000                    |
| 15              | Glycyl-L-Glutamic Acid               | Amino acids                 | 1.77                    | 2.83                     | 78.37                       | 0.051                    | 0.009                    | 0.011                    |
| 16              | D-Galactonic Acid/ $\gamma$ -Lactone | Carboxylic and Acetic Acids | 1.61                    | 2.59                     | 80.95                       | 0.043                    | 0.013                    | 0.012                    |
| 17              | L-Threonine                          | Amino acids                 | 1.54                    | 2.47                     | 83.42                       | 0.046                    | 0.001                    | 0.001                    |
| 18              | i-Erythritol                         | Carbohydrates               | 1.46                    | 2.34                     | 85.76                       | 0.033                    | 0.004                    | 0.021                    |
| 19              | $\gamma$ -Hydroxybutyric Acid        | Carboxylic and Acetic Acids | 1.45                    | 2.32                     | 88.08                       | 0.039                    | 0.003                    | 0.010                    |
| 20              | Glycogen                             | Polymers                    | 1.41                    | 2.26                     | 90.34                       | 0.043                    | 0.002                    | 0.002                    |
| 21              | D-Galacturonic Acid                  | Carboxylic and Acetic Acids | 1.16                    | 1.86                     | 92.20                       | 0.034                    | 0.005                    | 0.001                    |
| 22              | D-Xylose                             | Carbohydrates               | 0.77                    | 1.24                     | 93.44                       | 0.023                    | 0.001                    | 0.001                    |
| 23              | D-Glucosaminic Acid                  | Carboxylic and Acetic Acids | 0.74                    | 1.18                     | 94.62                       | 0.014                    | 0.012                    | 0.003                    |
| 24              | 2-Hydroxy Benzoic Acid               | Carboxylic and Acetic Acids | 0.73                    | 1.17                     | 95.79                       | 0.022                    | 0.000                    | 0.000                    |
| 25              | Glucose-1-Phosphate                  | Carbohydrates               | 0.65                    | 1.04                     | 96.83                       | 0.019                    | 0.001                    | 0.001                    |
| 26              | $\alpha$ -Cyclodextrin               | Polymers                    | 0.59                    | 0.94                     | 97.77                       | 0.017                    | 0.000                    | 0.000                    |
| 27              | L-Phenylalanine                      | Amino acids                 | 0.40                    | 0.64                     | 98.41                       | 0.011                    | 0.001                    | 0.002                    |
| 28              | D,L- $\alpha$ -Glycerol Phosphate    | Carbohydrates               | 0.36                    | 0.58                     | 98.98                       | 0.007                    | 0.009                    | 0.005                    |
| 29              | $\alpha$ -Ketobutyric Acid           | Carboxylic and Acetic Acids | 0.28                    | 0.45                     | 99.44                       | 0.008                    | 0.000                    | 0.001                    |
| 30              | $\beta$ -Methyl-D-Glucoside          | Carbohydrates               | 0.28                    | 0.45                     | 99.88                       | 0.008                    | 0.000                    | 0.001                    |
| 31              | $\alpha$ -D-Lactose                  | Carbohydrates               | 0.07                    | 0.12                     | 100.00                      | 0.002                    | 0.000                    | 0.000                    |

<sup>1</sup> Av. dissim, average dissimilarity.

<sup>2</sup> Contrib., contribution of each C source to group differences.

<sup>3</sup> Cumulative, sum of each C-source contribution to group differences.

<sup>4</sup> AWCD, average well colour development.

**Table S3.** Relative abundance (%) of the bacterial phyla and the most abundant bacterial classes found in the studied layers A14 (upper), A16 (intermediate) and A18 (lower). The data represent the mean values of the six replicate libraries analyzed in each layer. For each taxonomic group, values followed by different letters are significantly different ( $p \leq 0.05$ ) according to Tukey's HSD test.

|                                              | A14     | A16     | A18      |
|----------------------------------------------|---------|---------|----------|
| <b>Bacterial phyla</b>                       |         |         |          |
| <i>Proteobacteria</i>                        | 21.44 a | 30.08 b | 27.30 b  |
| <i>Actinobacteria</i>                        | 20.26 a | 24.14 b | 21.66 ab |
| <i>Acidobacteria</i>                         | 15.37 b | 11.15 a | 12.45 a  |
| <i>Firmicutes</i>                            | 6.65 a  | 4.47 a  | 5.45 a   |
| <i>Chloroflexi</i>                           | 4.69 a  | 4.74 a  | 4.64 a   |
| <i>Nitrospirae</i>                           | 5.51 b  | 4.31 a  | 3.99 a   |
| <i>Planctomycetes</i>                        | 3.83 a  | 2.56 a  | 2.64 a   |
| <i>Bacteroidetes</i>                         | 1.55 b  | 0.65 a  | 0.70 a   |
| <i>Gemmatimonadetes</i>                      | 0.96 ab | 0.82 a  | 1.01 b   |
| <i>Verrucomicrobia</i>                       | 1.44 b  | 0.58 a  | 0.45 a   |
| <i>Latescibacteria</i>                       | 0.57 b  | 0.31 a  | 0.45 b   |
| <i>Armatimonadetes</i>                       | 0.40 a  | 0.31 a  | 0.51 a   |
| Others                                       | 0.52 a  | 0.33 a  | 0.43 a   |
| Unclassified                                 | 16.80 a | 15.56 a | 18.31 a  |
| <b>Bacterial classes</b>                     |         |         |          |
| <i>Actinobacteria (Actinobacteria)</i>       | 19.86 a | 23.75 b | 20.95 ab |
| <i>Gamma proteobacteria (Proteobacteria)</i> | 3.64 a  | 18.00 c | 9.89 b   |
| <i>Alpha proteobacteria (Proteobacteria)</i> | 8.90 b  | 4.75 a  | 4.42 a   |
| <i>Beta proteobacteria (Proteobacteria)</i>  | 3.76 a  | 3.21 a  | 8.24 b   |
| <i>Nitrospira (Nitrospirae)</i>              | 5.51 b  | 4.31 a  | 3.99 a   |
| <i>Delta proteobacteria (Proteobacteria)</i> | 4.71 b  | 3.68 a  | 4.31 b   |
| <i>Gp6 (Acidobacteria)</i>                   | 4.80 b  | 2.94 a  | 2.96 a   |
| <i>Anaerolineae (Chloroflexi)</i>            | 3.11 a  | 3.68 b  | 3.62 b   |
| <i>Gp7 (Acidobacteria)</i>                   | 3.07 ab | 2.76 a  | 3.56 b   |
| <i>Clostridia (Firmicutes)</i>               | 3.71 b  | 2.22 a  | 2.86 a   |
| <i>Planctomycetia (Planctomycetes)</i>       | 3.45 b  | 2.34 a  | 2.37 a   |
| <i>Gp4 (Acidobacteria)</i>                   | 2.58 b  | 1.53 a  | 1.59 a   |
| <i>Bacilli (Firmicutes)</i>                  | 1.72 a  | 1.54 a  | 1.95 a   |
| <i>Gp16 (Acidobacteria)</i>                  | 1.26 a  | 1.04 a  | 1.02 a   |
| <i>Gemmatimonadetes (Gemmatimonadetes)</i>   | 0.96 ab | 0.82 a  | 1.01 b   |

**Table S4.** Identification and relative abundances of bacterial OTUs reported from SIMPER analysis and contributing  $\geq 0.2\%$  to dissimilarities in bacterial community structures among the studied layers A14 (upper), A16 (intermediate) and A18 (lower). The data represent the mean values of the six replicate libraries analyzed in each layer. For each bacterial OTU, values followed by different letters are significantly different ( $p \leq 0.05$ ) according to Tukey's HSD test.

| OTU id   | OTU classification at genus level (Phylum)        | Confidence threshold (%) | A14    | A16     | A18     |
|----------|---------------------------------------------------|--------------------------|--------|---------|---------|
| OTU_1    | <i>Pseudomonas</i> (Proteobacteria)               | 100                      | 0.65 a | 10.20 c | 3.86 b  |
| OTU_465  | <i>Pseudomonas</i> (Proteobacteria)               | 100                      | 0.95 a | 4.07 b  | 2.86 b  |
| OTU_4    | <i>Janthinobacterium</i> (Proteobacteria)         | 17                       | 0.07 a | 0.13 a  | 2.89 b  |
| OTU_2    | <i>Jatrophihabitans</i> (Actinobacteria)          | 16                       | 1.42 a | 2.46 a  | 3.80 b  |
| OTU_3    | <i>Acidotherrmus</i> (Actinobacteria)             | 17                       | 0.93 a | 3.31 b  | 1.69 a  |
| OTU_12   | <i>Thermoanaerobaculum</i> (Acidobacteria)        | 17                       | 1.54 b | 0.30 a  | 0.32 a  |
| OTU_3392 | <i>Thermocatellispora</i> (Actinobacteria)        | 5                        | 0.29 a | 1.49 b  | 0.19 a  |
| OTU_27   | <i>Rhodoferax</i> (Proteobacteria)                | 100                      | 0.05 a | 0.02 a  | 1.23 b  |
| OTU_9    | <i>Pseudomonas</i> (Proteobacteria)               | 88                       | 0.55 a | 1.47 b  | 1.31 ab |
| OTU_7    | <i>Aquihabitans</i> (Actinobacteria)              | 10                       | 0.92 a | 1.73 b  | 1.92 b  |
| OTU_13   | <i>Polaromonas</i> (Proteobacteria)               | 96                       | 0.25 a | 0.07 a  | 1.14 b  |
| OTU_11   | <i>Garicola</i> (Actinobacteria)                  | 22                       | 0.71 a | 0.52 a  | 1.06 a  |
| OTU_8    | <i>Nitrospira</i> (Nitrospirae)                   | 100                      | 2.21 a | 1.38 a  | 1.53 a  |
| OTU_20   | <i>Dehalococcoides</i> (Chloroflexi)              | 10                       | 0.82 a | 0.89 a  | 1.35 a  |
| OTU_6    | <i>Thermosulfurimonas</i> (Thermodesulfobacteria) | 15                       | 0.79 a | 1.09 b  | 1.19 b  |
| OTU_179  | <i>Pseudomonas</i> (Proteobacteria)               | 100                      | 0.16 a | 0.51 a  | 0.77 a  |
| OTU_19   | <i>Aquihabitans</i> (Actinobacteria)              | 14                       | 1.74 b | 1.12 a  | 1.07 a  |
| OTU_5    | <i>Thermomarinilinea</i> (Chloroflexi)            | 71                       | 1.26 a | 1.73 a  | 1.56 a  |
| OTU_21   | <i>Nitrospira</i> (Nitrospirae)                   | 100                      | 0.85 b | 0.72 ab | 0.28 a  |
| OTU_26   | <i>Pseudomonas</i> (Proteobacteria)               | 100                      | 0.03 a | 0.77 b  | 0.20 a  |
| OTU_43   | <i>Methyloceanibacter</i> (Proteobacteria)        | 72                       | 1.09 a | 0.61 a  | 0.66 a  |
| OTU_73   | <i>Thermodesulfobium</i> (Firmicutes)             | 50                       | 0.74 b | 0.19 a  | 0.08 a  |
| OTU_17   | <i>Rubrivirga</i> (Bacteroidetes)                 | 17                       | 0.40 a | 0.46 a  | 0.87 b  |
| OTU_84   | <i>Phyllobacterium</i> (Proteobacteria)           | 100                      | 0.73 a | 0.41 a  | 0.25 a  |
| OTU_112  | <i>Bradyrhizobium</i> (Proteobacteria)            | 64                       | 0.66 b | 0.35 ab | 0.16 a  |
| OTU_157  | <i>Acetonema</i> (Firmicutes)                     | 40                       | 0.65 a | 0.37 a  | 0.23 a  |
| OTU_47   | <i>Agromyces</i> (Actinobacteria)                 | 99                       | 0.55 a | 0.37 a  | 0.10 a  |
| OTU_24   | <i>Nitrospira</i> (Nitrospirae)                   | 100                      | 0.92 a | 0.68 a  | 0.49 a  |
| OTU_33   | <i>Hydrogenispora</i> (Firmicutes)                | 100                      | 0.58 b | 0.04 a  | 0.05 a  |
| OTU_16   | <i>Desulfatitalea</i> (Proteobacteria)            | 7                        | 0.52 a | 0.87 a  | 0.88 a  |
| OTU_32   | <i>Terrimicrobium</i> (Verrucomicrobia)           | 97                       | 0.54 b | 0.12 a  | 0.01 a  |
| OTU_34   | <i>Thermosulfidibacter</i> (Aquificae)            | 18                       | 0.22 a | 0.54 b  | 0.69 b  |
| OTU_96   | <i>Massilia</i> (Proteobacteria)                  | 98                       | 0.01 a | 0.55 b  | 0.01 a  |
| OTU_14   | Gp7 (Acidobacteria)                               | 96                       | 0.39 a | 0.67 ab | 0.79 b  |
| OTU_10   | <i>Fodinicola</i> (Actinobacteria)                | 8                        | 1.08 a | 1.47 b  | 1.44 b  |
| OTU_74   | <i>Gaiella</i> (Actinobacteria)                   | 82                       | 0.56 b | 0.12 a  | 0.08 a  |
| OTU_221  | <i>Alsobacter</i> (Proteobacteria)                | 54                       | 0.52 b | 0.01a   | 0.01 a  |
| OTU_83   | <i>Anaerolinea</i> (Chloroflexi)                  | 23                       | 0.54 b | 0.34 ab | 0.11 a  |
| OTU_15   | <i>Thermoanaerobaculum</i> (Acidobacteria)        | 6                        | 0.57 a | 0.46 a  | 0.62 a  |
| OTU_39   | <i>Desulfovirga</i> (Proteobacteria)              | 18                       | 0.25 a | 0.37 a  | 0.68 b  |
| OTU_45   | <i>Rhodococcus</i> (Actinobacteria)               | 100                      | 0.07 a | 0.51 b  | 0.01 a  |
| OTU_28   | <i>Hoeflea</i> (Proteobacteria)                   | 70                       | 0.26 b | 0.04 a  | 0.41 a  |
| OTU_38   | <i>Nitrospira</i> (Nitrospirae)                   | 89                       | 0.60 b | 0.30 a  | 0.15 a  |
| OTU_51   | <i>Phycisphaera</i> (Planctomycetes)              | 22                       | 0.45 b | 0.07 a  | 0.03 a  |
| OTU_48   | <i>Thermodesulfobium</i> (Firmicutes)             | 54                       | 0.54 a | 0.54 a  | 0.92 b  |
| OTU_49   | <i>Gaiella</i> (Actinobacteria)                   | 95                       | 0.51 b | 0.14 a  | 0.17 a  |
| OTU_41   | <i>Nitrospira</i> (Nitrospirae)                   | 98                       | 0.04 a | 0.35 b  | 0.46 b  |
| OTU_22   | Gp7 (Acidobacteria)                               | 100                      | 0.91 a | 0.61 a  | 0.60 a  |
| OTU_18   | Gp15 (Acidobacteria)                              | 100                      | 0.30 a | 0.34 a  | 0.50 a  |
| OTU_40   | <i>Gaiella</i> (Actinobacteria)                   | 100                      | 0.29 a | 0.56 b  | 0.55 b  |
| OTU_57   | <i>Dongia</i> (Proteobacteria)                    | 82                       | 0.37 b | 0.26 ab | 0.08 a  |
| OTU_124  | <i>Hyphomicrobium</i> (Proteobacteria)            | 55                       | 0.56 a | 0.38 a  | 0.28 a  |
| OTU_111  | <i>Paenibacillus</i> (Firmicutes)                 | 99                       | 0.34 a | 0.39 a  | 0.61 b  |
| OTU_135  | Gp4 (Acidobacteria)                               | 100                      | 0.40 b | 0.18 a  | 0.09 a  |
| OTU_75   | <i>Smithella</i> (Proteobacteria)                 | 32                       | 0.33 b | 0.12 a  | 0.09 a  |
| OTU_4115 | Gp18 (Acidobacteria)                              | 96                       | 0.32 b | 0.04 a  | 0.02 a  |
| OTU_54   | <i>Kribbella</i> (Actinobacteria)                 | 100                      | 0.06 a | 0.36 b  | 0.04 a  |
| OTU_59   | <i>Desulfobaculum</i> (Proteobacteria)            | 19                       | 0.57 b | 0.28 a  | 0.28 a  |
| OTU_66   | <i>Sulfurisoma</i> (Proteobacteria)               | 25                       | 0.23 a | 0.35 a  | 0.40 a  |
| OTU_136  | Gp4 (Acidobacteria)                               | 100                      | 0.38 a | 0.29 a  | 0.39 a  |
| OTU_89   | Gp7 (Acidobacteria)                               | 100                      | 0.54 b | 0.23 a  | 0.32 a  |
| OTU_30   | Gp7 (Acidobacteria)                               | 98                       | 0.14 a | 0.29 b  | 0.42 b  |
| OTU_177  | <i>Massilia</i> (Proteobacteria)                  | 100                      | 0.04 a | 0.10 a  | 0.34 b  |
| OTU_44   | <i>Longilinea</i> (Chloroflexi)                   | 26                       | 0.54 a | 0.51 a  | 0.43 a  |
| OTU_69   | <i>Thermoflexus</i> (Chloroflexi)                 | 22                       | 0.17 a | 0.29 ab | 0.39 b  |
| OTU_1468 | <i>Gaiella</i> (Actinobacteria)                   | 99                       | 0.41 b | 0.24 ab | 0.18 a  |
| OTU_97   | <i>Thermotunica</i> (Actinobacteria)              | 40                       | 0.28 b | 0.02 a  | 0.01 a  |

**Table S5.** Relative abundances (%) of the archaeal phyla and the most abundant archaeal classes found in the studied layers A14 (upper), A16 (intermediate) and A18 (lower). The data represent the mean values of the six replicate libraries analyzed in each layer. For each taxonomic group, values followed by different letters are significantly different ( $p \leq 0.05$ ) according to Tukey's HSD test.

|                                                          | A14     | A16     | A18     |
|----------------------------------------------------------|---------|---------|---------|
| <b>Archaeal phyla</b>                                    |         |         |         |
| <i>Thaumarchaeota</i>                                    | 90.93 a | 88.88 a | 89.92 a |
| <i>Euryarchaeota</i>                                     | 7.52 a  | 9.24 a  | 8.95 a  |
| <i>Pacearchaeota</i>                                     | 1.27 a  | 1.58 a  | 0.89 a  |
| <i>Aenigmarchaeota</i>                                   | 0.07 a  | 0.09 a  | 0.09 a  |
| <i>Woesearchaeota</i>                                    | 0.01 a  | 0.10 a  | 0.04 a  |
| <i>Crenarchaeota</i>                                     | 0.02 a  | 0.01 a  | 0.02 a  |
| Unclassified                                             | 0.18 a  | 0.10 a  | 0.10 a  |
| <b>Archaeal classes</b>                                  |         |         |         |
| <i>Nitrososphaerales (Thaumarchaeota)</i>                | 90.10 a | 87.30 a | 89.07 a |
| <i>Thermoplasmata (Euryarchaeota)</i>                    | 6.30 a  | 7.13 a  | 6.76 a  |
| <i>Nitrosopumilales (Thaumarchaeota)</i>                 | 0.42 a  | 0.56 a  | 0.39 a  |
| <i>Pacearchaeota Incertae Sedis AR13 (Pacearchaeota)</i> | 1.27 a  | 1.58 a  | 0.89 a  |
| <i>Candidatus Aenigmarchaeum (Aenigmarchaeota)</i>       | 0.07 a  | 0.09 a  | 0.09 a  |
| <i>Methanomicrobia (Euryarchaeota)</i>                   | 0.13 a  | 0.07 a  | 0.17 a  |
| <i>Thermoprotei (Crenarchaeota)</i>                      | 0.02 a  | 0.01 a  | 0.02 a  |

**Table S6.** Identification and relative abundances of archaeal OTUs reported from SIMPER analysis and contributing  $\geq 0.2\%$  to dissimilarities in archaeal community structures among the studied layers A14 (upper), A16 (intermediate) and A18 (lower). The data represent the mean values of the six replicate libraries analyzed in each layer. For each archaeal OTU, values followed by different letters are significantly different ( $p \leq 0.05$ ) according to Tukey's HSD test.

| OTU id   | OTU classification at genus level (Phylum)                        | Confidence threshold (%) | A14            | A16            | A18            |
|----------|-------------------------------------------------------------------|--------------------------|----------------|----------------|----------------|
| OTU_11   | <i>Nitrososphaera</i> ( <i>Thaumarchaeota</i> )                   | 100                      | 42.58 <b>a</b> | 60.54 <b>b</b> | 66.89 <b>b</b> |
| OTU_16   | <i>Nitrososphaera</i> ( <i>Thaumarchaeota</i> )                   | 100                      | 29.03 <b>b</b> | 12.26 <b>a</b> | 9.13 <b>a</b>  |
| OTU_53   | <i>Nitrososphaera</i> ( <i>Thaumarchaeota</i> )                   | 100                      | 6.64 <b>a</b>  | 3.75 <b>a</b>  | 3.37 <b>a</b>  |
| OTU_104  | <i>Methanomassiliicoccus</i> ( <i>Euryarchaeota</i> )             | 66                       | 3.85 <b>a</b>  | 4.48 <b>a</b>  | 4.01 <b>a</b>  |
| OTU_87   | <i>Nitrososphaera</i> ( <i>Thaumarchaeota</i> )                   | 100                      | 4.78 <b>a</b>  | 4.49 <b>a</b>  | 3.88 <b>a</b>  |
| OTU_109  | <i>Nitrososphaera</i> ( <i>Thaumarchaeota</i> )                   | 100                      | 4.56 <b>a</b>  | 4.04 <b>a</b>  | 3.57 <b>a</b>  |
| OTU_384  | <i>Methanomassiliicoccus</i> ( <i>Euryarchaeota</i> )             | 69                       | 0.61 <b>a</b>  | 0.32 <b>a</b>  | 0.63 <b>a</b>  |
| OTU_4367 | <i>Methanomassiliicoccus</i> ( <i>Euryarchaeota</i> )             | 66                       | 0.66 <b>a</b>  | 0.99 <b>a</b>  | 0.75 <b>a</b>  |
| OTU_368  | <i>Methanomassiliicoccus</i> ( <i>Euryarchaeota</i> )             | 57                       | 0.58 <b>a</b>  | 0.77 <b>a</b>  | 0.73 <b>a</b>  |
| OTU_552  | <i>Nitrososphaera</i> ( <i>Thaumarchaeota</i> )                   | 49                       | 0.38 <b>a</b>  | 0.95 <b>b</b>  | 0.38 <b>a</b>  |
| OTU_594  | <i>Methanomassiliicoccus</i> ( <i>Euryarchaeota</i> )             | 41                       | 0.27 <b>a</b>  | 0.67 <b>a</b>  | 0.62 <b>a</b>  |
| OTU_410  | <i>Pacearchaeota</i> Incertae Sedis AR13 ( <i>Pacearchaeota</i> ) | 53                       | 0.44 <b>a</b>  | 0.15 <b>a</b>  | 0.06 <b>a</b>  |
| OTU_399  | <i>Nitrososphaera</i> ( <i>Thaumarchaeota</i> )                   | 100                      | 0.68 <b>a</b>  | 0.48 <b>a</b>  | 0.54 <b>a</b>  |
| OTU_561  | <i>Nitrososphaera</i> ( <i>Thaumarchaeota</i> )                   | 100                      | 0.55 <b>b</b>  | 0.14 <b>a</b>  | 0.11 <b>a</b>  |
| OTU_897  | <i>Methanomassiliicoccus</i> ( <i>Euryarchaeota</i> )             | 19                       | 0.06 <b>a</b>  | 0.39 <b>a</b>  | 0.20 <b>a</b>  |
| OTU_383  | <i>Pacearchaeota</i> Incertae Sedis AR13 ( <i>Pacearchaeota</i> ) | 64                       | 0.38 <b>a</b>  | 0.13 <b>a</b>  | 0.08 <b>a</b>  |
| OTU_544  | <i>Nitrosopumilus</i> ( <i>Thaumarchaeota</i> )                   | 100                      | 0.27 <b>a</b>  | 0.44 <b>a</b>  | 0.36 <b>a</b>  |
| OTU_616  | <i>Nitrososphaera</i> ( <i>Thaumarchaeota</i> )                   | 100                      | 0.33 <b>a</b>  | 0.37 <b>a</b>  | 0.50 <b>a</b>  |
| OTU_3467 | <i>Methanomassiliicoccus</i> ( <i>Euryarchaeota</i> )             | 37                       | 0.11 <b>a</b>  | 0.25 <b>ab</b> | 0.42 <b>b</b>  |
| OTU_887  | <i>Pacearchaeota</i> Incertae Sedis AR13 ( <i>Pacearchaeota</i> ) | 77                       | 0.00 <b>a</b>  | 0.35 <b>a</b>  | 0.00 <b>a</b>  |
| OTU_529  | <i>Pacearchaeota</i> Incertae Sedis AR13 ( <i>Pacearchaeota</i> ) | 80                       | 0.25 <b>a</b>  | 0.08 <b>a</b>  | 0.08 <b>a</b>  |
| OTU_1270 | <i>Nitrososphaera</i> ( <i>Thaumarchaeota</i> )                   | 100                      | 0.39 <b>b</b>  | 0.20 <b>ab</b> | 0.10 <b>a</b>  |
| OTU_1426 | <i>Pacearchaeota</i> Incertae Sedis AR13 ( <i>Pacearchaeota</i> ) | 68                       | 0.08 <b>a</b>  | 0.02 <b>a</b>  | 0.26 <b>a</b>  |
| OTU_573  | <i>Methanomassiliicoccus</i> ( <i>Euryarchaeota</i> )             | 36                       | 0.23 <b>a</b>  | 0.29 <b>a</b>  | 0.19 <b>a</b>  |
| OTU_4810 | <i>Nitrososphaera</i> ( <i>Thaumarchaeota</i> )                   | 100                      | 0.32 <b>a</b>  | 0.30 <b>a</b>  | 0.45 <b>a</b>  |
| OTU_1054 | <i>Pacearchaeota</i> Incertae Sedis AR13 ( <i>Pacearchaeota</i> ) | 67                       | 0.01 <b>a</b>  | 0.25 <b>a</b>  | 0.01 <b>a</b>  |
| OTU_810  | <i>Methanomassiliicoccus</i> ( <i>Euryarchaeota</i> )             | 51                       | 0.20 <b>a</b>  | 0.21 <b>a</b>  | 0.07 <b>a</b>  |
| OTU_1446 | <i>Methanomassiliicoccus</i> ( <i>Euryarchaeota</i> )             | 27                       | 0.07 <b>a</b>  | 0.21 <b>a</b>  | 0.12 <b>a</b>  |
| OTU_871  | <i>Pacearchaeota</i> Incertae Sedis AR13 ( <i>Pacearchaeota</i> ) | 81                       | 0.04 <b>a</b>  | 0.11 <b>a</b>  | 0.14 <b>a</b>  |
| OTU_1143 | <i>Pacearchaeota</i> Incertae Sedis AR13 ( <i>Pacearchaeota</i> ) | 97                       | 0.10 <b>a</b>  | 0.06 <b>a</b>  | 0.12 <b>a</b>  |
| OTU_1465 | <i>Nitrososphaera</i> ( <i>Thaumarchaeota</i> )                   | 69                       | 0.08 <b>a</b>  | 0.18 <b>a</b>  | 0.12 <b>a</b>  |
| OTU_931  | <i>Methanomassiliicoccus</i> ( <i>Euryarchaeota</i> )             | 76                       | 0.11 <b>a</b>  | 0.17 <b>a</b>  | 0.24 <b>a</b>  |
| OTU_1826 | <i>Pacearchaeota</i> Incertae Sedis AR13 ( <i>Pacearchaeota</i> ) | 92                       | 0.00 <b>a</b>  | 0.13 <b>a</b>  | 0.04 <b>a</b>  |
| OTU_1372 | <i>Pacearchaeota</i> Incertae Sedis AR13 ( <i>Pacearchaeota</i> ) | 90                       | 0.01 <b>a</b>  | 0.04 <b>a</b>  | 0.12 <b>a</b>  |
| OTU_2665 | <i>Methanomassiliicoccus</i> ( <i>Euryarchaeota</i> )             | 70                       | 0.06 <b>a</b>  | 0.15 <b>a</b>  | 0.06 <b>a</b>  |
| OTU_1918 | <i>Methanomassiliicoccus</i> ( <i>Euryarchaeota</i> )             | 53                       | 0.00 <b>a</b>  | 0.11 <b>a</b>  | 0.06 <b>a</b>  |

**Table S7.** Relative abundance (%) of the fungal phyla and the most abundant fungal classes found in the studied layers A14 (upper), A16 (intermediate) and A18 (lower). The data represent the mean values of the six replicate libraries analyzed in each layer. For each taxonomic group, values followed by different letters are significantly different ( $p \leq 0.05$ ) according to Tukey's HSD test.

|                                         | A14     | A16     | A18     |
|-----------------------------------------|---------|---------|---------|
| <b>Fungal phyla</b>                     |         |         |         |
| <i>Ascomycota</i>                       | 57.66 a | 80.48 a | 54.68 a |
| <i>Basidiomycota</i>                    | 23.46 a | 13.62 a | 35.13 a |
| <i>Chytridiomycota</i>                  | 7.71 a  | 3.43 a  | 6.09 a  |
| <i>Zygomycota</i>                       | 1.26 a  | 1.39 a  | 0.70 a  |
| <i>Glomeromycota</i>                    | 0.03 a  | 0.00 a  | 0.01 a  |
| Unclassified                            | 9.88 a  | 1.07 a  | 3.39 a  |
| <b>Fungal classes</b>                   |         |         |         |
| <i>Sordariomycetes (Ascomycota)</i>     | 28.95 a | 71.82 b | 42.04 a |
| <i>Agaricomycetes (Basidiomycota)</i>   | 19.79 a | 13.21 a | 32.03 a |
| <i>Leotiomycetes (Ascomycota)</i>       | 14.73 b | 1.73 a  | 0.22 a  |
| <i>Dothideomycetes (Ascomycota)</i>     | 1.33 a  | 4.47 a  | 3.32 a  |
| <i>Eurotiomycetes (Ascomycota)</i>      | 0.74 a  | 0.53 a  | 4.46 a  |
| Incertae sedis 14 ( <i>Ascomycota</i> ) | 1.43 a  | 0.04 a  | 3.30 a  |
| Incertae sedis 10 ( <i>Zygomycota</i> ) | 1.26 a  | 1.39 a  | 0.70 a  |
| <i>Tremellomycetes (Basidiomycota)</i>  | 1.48 a  | 0.01 a  | 0.01 a  |



**Table S8.** Identification and relative abundances of fungal OTUs reported from SIMPER analysis and contributing  $\geq 0.2\%$  to dissimilarities in fungal community structures among the studied layers A14 (upper), A16 (intermediate) and A18 (lower). The data represent the mean values of the six replicate libraries analyzed in each layer. For each fungal OTU, values followed by different letters are significantly different ( $p \leq 0.05$ ) according to Tukey's HSD test.

| OTU id | OTU classification at genus level (Phylum)     | Confidence threshold (%) | A14    | A16     | A18     |
|--------|------------------------------------------------|--------------------------|--------|---------|---------|
| OTU_1  | <i>Ilyonectria</i> (Ascomycota)                | 99                       | 6.82 a | 49.71 b | 11.31 a |
| OTU_3  | <i>Ilyonectria</i> (Ascomycota)                | 100                      | 2.29 a | 2.35 a  | 15.87 b |
| OTU_2  | Russulales unidentified (Basidiomycota)        | 47                       | 0.12 a | 0.15 a  | 7.97 b  |
| OTU_33 | Ascomycota unidentified (Ascomycota)           | 67                       | 7.79 a | 0.04 a  | 0.04 a  |
| OTU_5  | <i>Tetracladium</i> (Ascomycota)               | 99                       | 6.46 b | 0.33 a  | 0.16 a  |
| OTU_10 | Chytridiomycota unidentified (Chytridiomycota) | 25                       | 6.01 a | 0.74 a  | 0.08 a  |
| OTU_50 | Fungi unidentified (Fungi)                     | 23                       | 5.53 a | 0.03 a  | 0.86 a  |
| OTU_19 | <i>Calcarisporiella</i> (Ascomycota)           | 97                       | 1.39 a | 0.06 a  | 4.34 a  |
| OTU_14 | <i>Scopuloides</i> (Basidiomycota)             | 99                       | 0.06 a | 0.04 a  | 5.26 a  |
| OTU_13 | <i>Cordyceps</i> (Ascomycota)                  | 100                      | 0.27 a | 0.77 a  | 3.94 a  |
| OTU_4  | <i>Synchytrium</i> (Chytridiomycota)           | 25                       | 0.78 a | 3.60 a  | 0.68 a  |
| OTU_9  | Tricholomataceae unidentified (Basidiomycota)  | 100                      | 2.61 a | 0.62 a  | 1.92 a  |
| OTU_21 | <i>Davidiella</i> (Ascomycota)                 | 96                       | 0.70 a | 0.34 a  | 3.07 a  |
| OTU_8  | <i>Rhexocercosporidium</i> (Ascomycota)        | 97                       | 2.91 a | 0.75 a  | 0.06 a  |
| OTU_16 | <i>Talaromyces</i> (Ascomycota)                | 90                       | 0.02 a | 0.02 a  | 2.97 a  |
| OTU_17 | Ascomycota unidentified (Ascomycota)           | 84                       | 2.93 b | 0.07 a  | 0.03 a  |
| OTU_11 | Nectriaceae unidentified (Ascomycota)          | 94                       | 2.74 a | 2.57 a  | 1.43 a  |
| OTU_6  | <i>Botryobasidium</i> (Basidiomycota)          | 100                      | 2.78 a | 0.05 a  | 0.05 a  |
| OTU_20 | <i>Vuilleminia</i> (Basidiomycota)             | 100                      | 2.58 a | 0.03 a  | 0.05 a  |
| OTU_29 | <i>Heterobasidion</i> (Basidiomycota)          | 100                      | 0.06 a | 2.34 a  | 0.03 a  |
| OTU_53 | <i>Hyphodermella</i> (Basidiomycota)           | 56                       | 2.23 a | 0.14 a  | 0.07 a  |
| OTU_12 | <i>Trametes</i> (Basidiomycota)                | 98                       | 0.91 a | 0.05 a  | 1.64 a  |
| OTU_26 | <i>Pucciniastrum</i> (Basidiomycota)           | 3                        | 0.03 a | 0.02 a  | 2.23 a  |
| OTU_27 | <i>Junghuhnia</i> (Basidiomycota)              | 5                        | 2.09 a | 0.18 a  | 0.02 a  |
| OTU_23 | <i>Baeospora</i> (Basidiomycota)               | 100                      | 0.03 a | 0.03 a  | 2.22 a  |
| OTU_44 | Thelephoraceae unidentified (Basidiomycota)    | 10                       | 2.19 a | 0.09 a  | 0.04 a  |
| OTU_57 | <i>Mortierella</i> (Zygomycota)                | 16                       | 2.16 a | 0.03 a  | 0.01 a  |
| OTU_32 | Hypocreales unidentified (Ascomycota)          | 96                       | 0.66 a | 0.02 a  | 1.59 a  |
| OTU_24 | Agaricales unidentified (Basidiomycota)        | 87                       | 0.02 a | 2.09 a  | 0.04 a  |
| OTU_38 | Tremellales unidentified (Basidiomycota)       | 1                        | 1.96 a | 0.01 a  | 0.02 a  |
| OTU_18 | Fungi unidentified (Fungi)                     | 50                       | 0.04 a | 0.03 a  | 1.93 a  |
| OTU_28 | <i>Ceratobasidium</i> (Basidiomycota)          | 99                       | 0.02 a | 0.02 a  | 1.89 a  |
| OTU_43 | <i>Davidiella</i> (Ascomycota)                 | 100                      | 0.04 a | 1.55 b  | 0.65 ab |
| OTU_41 | <i>Mortierella</i> (Zygomycota)                | 78                       | 0.46 a | 1.61 a  | 0.10 a  |
| OTU_47 | <i>Beauveria</i> (Ascomycota)                  | 57                       | 0.02 a | 0.06 a  | 1.75 a  |
| OTU_36 | <i>Rhodotorula</i> (Basidiomycota)             | 100                      | 0.66 a | 0.36 a  | 1.09 a  |
| OTU_40 | <i>Antrodia</i> (Basidiomycota)                | 100                      | 0.02 a | 0.02 a  | 1.77 a  |
| OTU_31 | <i>Ophiocordyceps</i> (Ascomycota)             | 22                       | 1.76 a | 0.01 a  | 0.02 a  |
| OTU_60 | <i>Skeletocutis</i> (Basidiomycota)            | 100                      | 0.04 a | 0.01 a  | 1.69 a  |
| OTU_15 | <i>Phellinus</i> (Basidiomycota)               | 96                       | 1.68 a | 0.02 a  | 0.03 a  |
| OTU_34 | <i>Alternaria</i> (Ascomycota)                 | 97                       | 0.04 a | 1.04 a  | 0.84 a  |
| OTU_54 | Myxotrichaceae unidentified (Ascomycota)       | 93                       | 0.94 a | 0.02 a  | 0.86 a  |
| OTU_59 | <i>Heterobasidion</i> (Basidiomycota)          | 100                      | 1.27 a | 0.38 a  | 0.03 a  |
| OTU_46 | <i>Aspergillus</i> (Ascomycota)                | 100                      | 1.57 a | 0.02 a  | 0.03 a  |
| OTU_7  | <i>Fomitopsis</i> (Basidiomycota)              | 100                      | 0.06 a | 0.28 a  | 1.41 a  |
| OTU_37 | <i>Ramicandelaber</i> (Zygomycota)             | 34                       | 1.45 b | 0.25 a  | 0.03 a  |
| OTU_42 | Agaricaceae unidentified (Basidiomycota)       | 9                        | 0.03 a | 0.01 a  | 1.50 a  |
| OTU_85 | <i>Cryptococcus</i> (Basidiomycota)            | 100                      | 1.49 a | 0.02a   | 0.02 a  |
| OTU_70 | Fungi unidentified (Fungi unidentified)        | 20                       | 0.02 a | 0.01a   | 1.47 a  |
| OTU_30 | <i>Auriscalpium</i> (Basidiomycota)            | 100                      | 0.02 a | 1.41 a  | 0.03 a  |
| OTU_45 | <i>Ischnoderma</i> (Basidiomycota)             | 100                      | 1.42 a | 0.03 a  | 0.05 a  |
| OTU_64 | <i>Resinicium</i> (Basidiomycota)              | 100                      | 1.31 a | 0.17 a  | 0.03 a  |
| OTU_39 | Agaricomycetes unidentified (Basidiomycota)    | 15                       | 0.02 a | 1.40 a  | 0.03a   |
| OTU_61 | <i>Rasamsonia</i> (Ascomycota)                 | 100                      | 0.03 a | 0.01 a  | 1.39 a  |
| OTU_22 | <i>Alternaria</i> (Ascomycota)                 | 100                      | 0.03 a | 1.39 a  | 0.04 a  |

|        |                                                             |     |        |        |        |
|--------|-------------------------------------------------------------|-----|--------|--------|--------|
| OTU_52 | <i>Ascomycota</i> unidentified ( <i>Ascomycota</i> )        | 95  | 0.21 a | 1.23 a | 0.03 a |
| OTU_48 | <i>Ilyonectria</i> ( <i>Ascomycota</i> )                    | 98  | 0.12 a | 0.55 a | 1.20 a |
| OTU_51 | <i>Mortierella</i> ( <i>Zygomycota</i> )                    | 99  | 0.38 a | 0.12 a | 1.09 a |
| OTU_56 | <i>Inocybe</i> ( <i>Basidiomycota</i> )                     | 10  | 0.60 a | 0.88 a | 0.02 a |
| OTU_58 | <i>Devriesia</i> ( <i>Ascomycota</i> )                      | 98  | 1.33 a | 0.01 a | 0.01 a |
| OTU_49 | <i>Ascomycota</i> unidentified ( <i>Ascomycota</i> )        | 48  | 1.34 b | 0.02 a | 0.02 a |
| OTU_62 | <i>Agaricomycetes</i> unidentified ( <i>Basidiomycota</i> ) | 100 | 0.03 a | 1.23 a | 0.04 a |
| OTU_55 | Fungi unidentified (Fungi)                                  | 11  | 0.03 a | 1.22 a | 0.02 a |
| OTU_76 | <i>Ophiocordyceps</i> ( <i>Ascomycota</i> )                 | 14  | 0.01 a | 0.01 a | 1.17 a |
| OTU_35 | <i>Acremonium</i> ( <i>Ascomycota</i> )                     | 90  | 1.31 a | 0.27 a | 0.29 a |
| OTU_67 | <i>Phellodon</i> ( <i>Basidiomycota</i> )                   | 5   | 0.01 a | 1.09 a | 0.01 a |
| OTU_63 | <i>Polyporaceae</i> unidentified ( <i>Basidiomycota</i> )   | 100 | 0.03 a | 1.06 a | 0.04 a |
| OTU_66 | <i>Candida</i> ( <i>Ascomycota</i> )                        | 100 | 0.02 a | 1.07 a | 0.03 a |
| OTU_68 | <i>Agaricales</i> unidentified ( <i>Basidiomycota</i> )     | 100 | 0.01 a | 1.05 a | 0.01 a |
| OTU_65 | <i>Phaeococcomyces</i> ( <i>Ascomycota</i> )                | 100 | 0.01 a | 0.01 a | 1.04 a |
| OTU_69 | <i>Septoglomus</i> ( <i>Glomeromycota</i> )                 | 7   | 0.26 a | 0.08 a | 0.87 a |
| OTU_74 | <i>Rhodotorula</i> ( <i>Basidiomycota</i> )                 | 1   | 0.98 a | 0.01 a | 0.00 a |
| OTU_87 | <i>Armillaria</i> ( <i>Basidiomycota</i> )                  | 100 | 0.49 a | 0.55 a | 0.02 a |
| OTU_77 | <i>Sistotrema</i> ( <i>Basidiomycota</i> )                  | 51  | 0.02 a | 0.95 a | 0.02 a |
| OTU_73 | <i>Tremellales</i> unidentified ( <i>Basidiomycota</i> )    | 16  | 0.90 a | 0.02 a | 0.02 a |
| OTU_71 | <i>Ramicandelaber</i> ( <i>Zygomycota</i> )                 | 97  | 0.55 a | 0.44 a | 0.01 a |
| OTU_78 | <i>Conocybe</i> ( <i>Basidiomycota</i> )                    | 100 | 0.01 a | 0.02 a | 0.79 a |
| OTU_72 | <i>Mortierella</i> ( <i>Zygomycota</i> )                    | 100 | 0.79 a | 0.09 a | 0.19 a |
| OTU_75 | <i>Tubulicrinis</i> ( <i>Basidiomycota</i> )                | 100 | 0.01 a | 0.79 a | 0.02 a |
| OTU_79 | Fungi unidentified (Fungi)                                  | 17  | 0.74 a | 0.02 a | 0.02 a |
| OTU_25 | <i>Fusarium</i> ( <i>Ascomycota</i> )                       | 93  | 0.91 a | 1.26 a | 0.83 a |
| OTU_89 | <i>Tomentella</i> ( <i>Basidiomycota</i> )                  | 99  | 0.02 a | 0.01 a | 0.70 a |
| OTU_80 | <i>Ascomycota</i> unidentified ( <i>Ascomycota</i> )        | 100 | 0.01 a | 0.01 a | 0.70 a |
| OTU_84 | <i>Boletus</i> ( <i>Basidiomycota</i> )                     | 83  | 0.01 a | 0.64 a | 0.01 a |
| OTU_98 | <i>Mortierella</i> ( <i>Zygomycota</i> )                    | 100 | 0.60 a | 0.06 a | 0.14 a |
| OTU_81 | <i>Phoma</i> ( <i>Ascomycota</i> )                          | 99  | 0.03 a | 0.08 a | 0.57 a |
| OTU_82 | <i>Taphrina</i> ( <i>Ascomycota</i> )                       | 89  | 0.02 a | 0.61 a | 0.02 a |
| OTU_88 | <i>Knufia</i> ( <i>Ascomycota</i> )                         | 7   | 0.01 a | 0.09 a | 0.53 a |
| OTU_83 | <i>Basidiomycota</i> unidentified ( <i>Basidiomycota</i> )  | 47  | 0.57 a | 0.00 a | 0.03 a |
| OTU_86 | <i>Datronia</i> ( <i>Basidiomycota</i> )                    | 100 | 0.01 a | 0.00 a | 0.55 a |
| OTU_90 | <i>Aspergillus</i> ( <i>Ascomycota</i> )                    | 100 | 0.01 a | 0.52 a | 0.00 a |
| OTU_94 | <i>Penicillium</i> ( <i>Ascomycota</i> )                    | 100 | 0.01 a | 0.24 a | 0.31 a |

**Table S9.** Results of pairwise PERMANOVA (permutational analysis of variance) and ANOSIM (analysis of similarities) comparing OTU-based bacterial and fungal community structures found in the layers A14 (upper), A16 (intermediate) and A18 (lower) (present study) and at the locations A2, A3, A6 and A7 (studied in a previous work<sup>5</sup> and also situated at Monte Iato settlement). F and R values in bold denote statistical significance ( $p \leq 0.05$ ).

|                       | PERMANOVA                 |                           |                           |                           | ANOSIM                   |                          |                          |                          |
|-----------------------|---------------------------|---------------------------|---------------------------|---------------------------|--------------------------|--------------------------|--------------------------|--------------------------|
| Bacterial communities |                           |                           |                           |                           |                          |                          |                          |                          |
|                       | A2                        | A3                        | A6                        | A7                        | A2                       | A3                       | A6                       | A7                       |
| <b>A14</b>            | <b>5.380</b><br>(0.0355)  | <b>4.859</b><br>(0.0328)  | <b>4.645</b><br>(0.0342)  | <b>3.929</b><br>(0.0374)  | <b>0.750</b><br>(0.0354) | <b>0.750</b><br>(0.0319) | <b>0.844</b><br>(0.0332) | 0.260<br>(0.1519)        |
| <b>A16</b>            | <b>15.280</b><br>(0.0381) | <b>14.930</b><br>(0.0358) | <b>15.260</b><br>(0.0375) | <b>13.780</b><br>(0.0367) | <b>1.000</b><br>(0.0353) | <b>1.000</b><br>(0.0355) | <b>1</b><br>(0.0352)     | <b>1</b><br>(0.0376)     |
| <b>A18</b>            | <b>19.580</b><br>(0.0357) | <b>20.000</b><br>(0.0412) | <b>20.840</b><br>(0.0342) | <b>19.480</b><br>(0.0353) | <b>1.000</b><br>(0.0377) | <b>1</b><br>(0.0322)     | <b>1</b><br>(0.0396)     | <b>1</b><br>(0.0381)     |
| Fungal communities    |                           |                           |                           |                           |                          |                          |                          |                          |
|                       | A2                        | A3                        | A6                        | A7                        | A2                       | A3                       | A6                       | A7                       |
| <b>A14</b>            | <b>3.416</b><br>(0.0031)  | <b>2.923</b><br>(0.0376)  | <b>3.279</b><br>(0.0353)  | <b>3.471</b><br>(0.0355)  | <b>0.655</b><br>(0.0024) | 0.490<br>(0.1054)        | <b>1</b><br>(0.0379)     | <b>0.771</b><br>(0.0360) |
| <b>A16</b>            | <b>5.896</b><br>(0.0028)  | <b>6.128</b><br>(0.0375)  | <b>6.866</b><br>(0.0396)  | <b>7.623</b><br>(0.0377)  | <b>0.857</b><br>(0.0020) | <b>1</b><br>(0.0376)     | <b>1</b><br>(0.0329)     | <b>1</b><br>(0.0359)     |
| <b>A18</b>            | <b>2.842</b><br>(0.0022)  | <b>2.231</b><br>(0.0345)  | <b>2.649</b><br>(0.0403)  | <b>2.914</b><br>(0.0345)  | <b>0.585</b><br>(0.0025) | 0.250<br>(0.2523)        | <b>1</b><br>(0.0380)     | <b>1</b><br>(0.0343)     |

**Table S10.** Relative abundances (%) of the bacterial phyla found in the layers A14 (upper), A16 (intermediate) and A18 (lower) (present study) and at the locations A2, A3, A6 and A7 (studied in a previous work<sup>5</sup> and also situated at Monte lato settlement). For each taxonomic group, values followed by different letters are significantly different ( $p \leq 0.05$ ) according to Tukey's HSD test.

|                       | <b>A14</b>      | <b>A16</b>       | <b>A18</b>      | <b>A2</b>       | <b>A3</b>       | <b>A6</b>       | <b>A7</b>       |
|-----------------------|-----------------|------------------|-----------------|-----------------|-----------------|-----------------|-----------------|
| <i>Proteobacteria</i> | 21.44 <b>b</b>  | 30.08 <b>c</b>   | 27.30 <b>c</b>  | 10.97 <b>a</b>  | 13.71 <b>a</b>  | 12.03 <b>a</b>  | 16.36 <b>ab</b> |
| <i>Actinobacteria</i> | 20.26 <b>a</b>  | 24.14 <b>abc</b> | 21.66 <b>ab</b> | 30.10 <b>cd</b> | 28.02 <b>bc</b> | 42.11 <b>e</b>  | 37.60 <b>de</b> |
| <i>Acidobacteria</i>  | 15.37 <b>b</b>  | 11.15 <b>a</b>   | 12.45 <b>a</b>  | 15.26 <b>b</b>  | 16.83 <b>b</b>  | 10.14 <b>a</b>  | 10.15 <b>a</b>  |
| <i>Firmicutes</i>     | 6.65 <b>b</b>   | 4.47 <b>ab</b>   | 5.45 <b>b</b>   | 0.38 <b>a</b>   | 0.39 <b>a</b>   | 0.27 <b>a</b>   | 0.32 <b>a</b>   |
| <i>Chloroflexi</i>    | 4.69 <b>b</b>   | 4.74 <b>b</b>    | 4.64 <b>b</b>   | 3.07 <b>a</b>   | 2.24 <b>a</b>   | 2.98 <b>a</b>   | 2.62 <b>a</b>   |
| <i>Nitrospirae</i>    | 5.51 <b>d</b>   | 4.31 <b>c</b>    | 3.99 <b>bc</b>  | 2.78 <b>ab</b>  | 2.42 <b>a</b>   | 2.31 <b>a</b>   | 3.91 <b>abc</b> |
| <i>Planctomycetes</i> | 3.83 <b>c</b>   | 2.56 <b>a</b>    | 2.64 <b>ab</b>  | 5.50 <b>d</b>   | 7.57 <b>e</b>   | 4.19 <b>bcd</b> | 2.87 <b>abc</b> |
| Others                | 5.44 <b>abc</b> | 3.00 <b>a</b>    | 3.55 <b>a</b>   | 5.16 <b>abc</b> | 3.97 <b>ab</b>  | 8.92 <b>bc</b>  | 9.34 <b>c</b>   |
| Unclassified          | 16.80 <b>a</b>  | 15.56 <b>a</b>   | 18.31 <b>ab</b> | 26.79 <b>c</b>  | 24.85 <b>bc</b> | 17.04 <b>ab</b> | 16.83 <b>ab</b> |

**Table S11.** Relative abundances (%) of the fungal classes found in the layers A14 (upper), A16 (intermediate) and A18 (lower) (present study) and at the locations A2, A3, A6 and A7 (studied in a previous work<sup>5</sup> and also situated at Monte lato settlement). For each taxonomic group, values followed by different letters are significantly different ( $p \leq 0.05$ ) according to Tukey's HSD test.

|                                       | <b>A14</b>      | <b>A16</b>     | <b>A18</b>     | <b>A2</b>       | <b>A3</b>      | <b>A6</b>      | <b>A7</b>       |
|---------------------------------------|-----------------|----------------|----------------|-----------------|----------------|----------------|-----------------|
| <i>Sordariomycetes (Ascomycota)</i>   | 28.95 <b>c</b>  | 71.82 <b>d</b> | 42.04 <b>c</b> | 19.69 <b>b</b>  | 25.30 <b>b</b> | 3.86 <b>a</b>  | 9.21 <b>a</b>   |
| <i>Agaricomycetes (Basidiomycota)</i> | 19.79 <b>b</b>  | 13.21 <b>b</b> | 32.03 <b>b</b> | 0.83 <b>a</b>   | 1.19 <b>a</b>  | 3.62 <b>a</b>  | 3.18 <b>a</b>   |
| <i>Leotiomyces (Ascomycota)</i>       | 14.73 <b>b</b>  | 1.73 <b>a</b>  | 0.22 <b>a</b>  | 0.51 <b>a</b>   | 8.82 <b>ab</b> | 0.04 <b>a</b>  | 1.63 <b>a</b>   |
| <i>Dothideomycetes (Ascomycota)</i>   | 1.33 <b>a</b>   | 4.47 <b>a</b>  | 3.32 <b>a</b>  | 53.91 <b>b</b>  | 47.36 <b>b</b> | 0.40 <b>a</b>  | 0.35 <b>a</b>   |
| <i>Eurotiomyces (Ascomycota)</i>      | 0.74 <b>a</b>   | 0.53 <b>a</b>  | 4.46 <b>a</b>  | 0.50 <b>a</b>   | 1.45 <b>a</b>  | 0.62 <b>a</b>  | 4.01 <b>a</b>   |
| Incertae_sedis_10 (Zygomycota)        | 1.26 <b>a</b>   | 1.39 <b>a</b>  | 0.70 <b>a</b>  | 9.31 <b>a</b>   | 4.06 <b>a</b>  | 0.13 <b>a</b>  | 0.81 <b>a</b>   |
| <i>Pezizomyces (Ascomycota)</i>       | 0.00 <b>a</b>   | 0.02 <b>a</b>  | 0.00 <b>a</b>  | 0.69 <b>a</b>   | 0.37 <b>a</b>  | 24.05 <b>b</b> | 45.52 <b>c</b>  |
| Others                                | 3.49 <b>a</b>   | 1.10 <b>a</b>  | 4.41 <b>a</b>  | 0.19 <b>a</b>   | 1.75 <b>a</b>  | 1.41 <b>a</b>  | 0.17 <b>a</b>   |
| Unclassified                          | 29.70 <b>ab</b> | 5.73 <b>a</b>  | 12.82 <b>a</b> | 14.36 <b>ab</b> | 9.71 <b>ab</b> | 65.88 <b>b</b> | 35.12 <b>ab</b> |
